# Supplementary material
Source: MDPI journal article supplement (https://www.mdpi.com/2673-7167/2/3/21)
Supplement: s1 [file s1 › physchem-1736105-supplementary.pdf]

# The Effect of Activation on the Structure of Biochars Prepared from Wood and from *Posidonia Oceanica*: a Spectroscopic Study

**Silvia Pizzanelli <sup>1,2,\*</sup>, Susanna Maisano <sup>3</sup>, Calogero Pinzino <sup>1</sup>, Antonella Manariti <sup>4</sup>, Vitaliano Chiodo <sup>3</sup>, Emanuela Pitzalis <sup>1</sup> and Claudia Forte <sup>1,2</sup>**

<sup>1</sup> Istituto di Chimica dei Composti OrganoMetallici, Consiglio Nazionale delle Ricerche—CNR, Via G. Moruzzi 1, 56124 Pisa, Italy

<sup>2</sup> Centro per l'Integrazione della Strumentazione Scientifica dell'Università di Pisa (CISUP), Lungarno Pacinotti 43/44, 56126 Pisa, Italy

<sup>3</sup> Istituto di Tecnologie Avanzate per l'Energia "Nicola Giordano", Consiglio Nazionale delle Ricerche—CNR, Via Salita S. Lucia sopra Contesse 5, 98126 Messina, Italy

<sup>4</sup> Dipartimento di Chimica e Chimica Industriale, Università di Pisa, Via G. Moruzzi 13, 56124 Pisa, Italy

\* Correspondence: [silvia.pizzanelli@pi.iccom.cnr.it](mailto:silvia.pizzanelli@pi.iccom.cnr.it); Tel.: +39-050-3152549

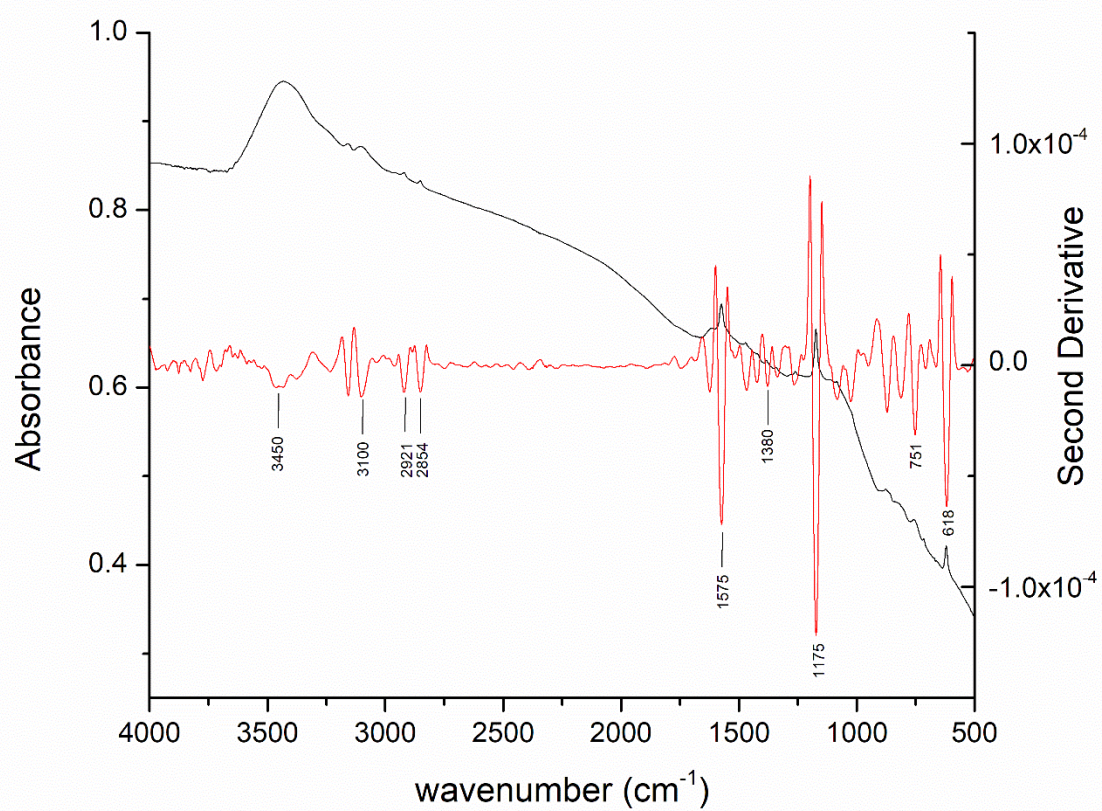

Figure S1. FT-IR spectrum of sample wB (black line) and its second derivative (red line). The left and right hand side scales are referred to the absorbance of the spectrum and to its second derivative, respectively.

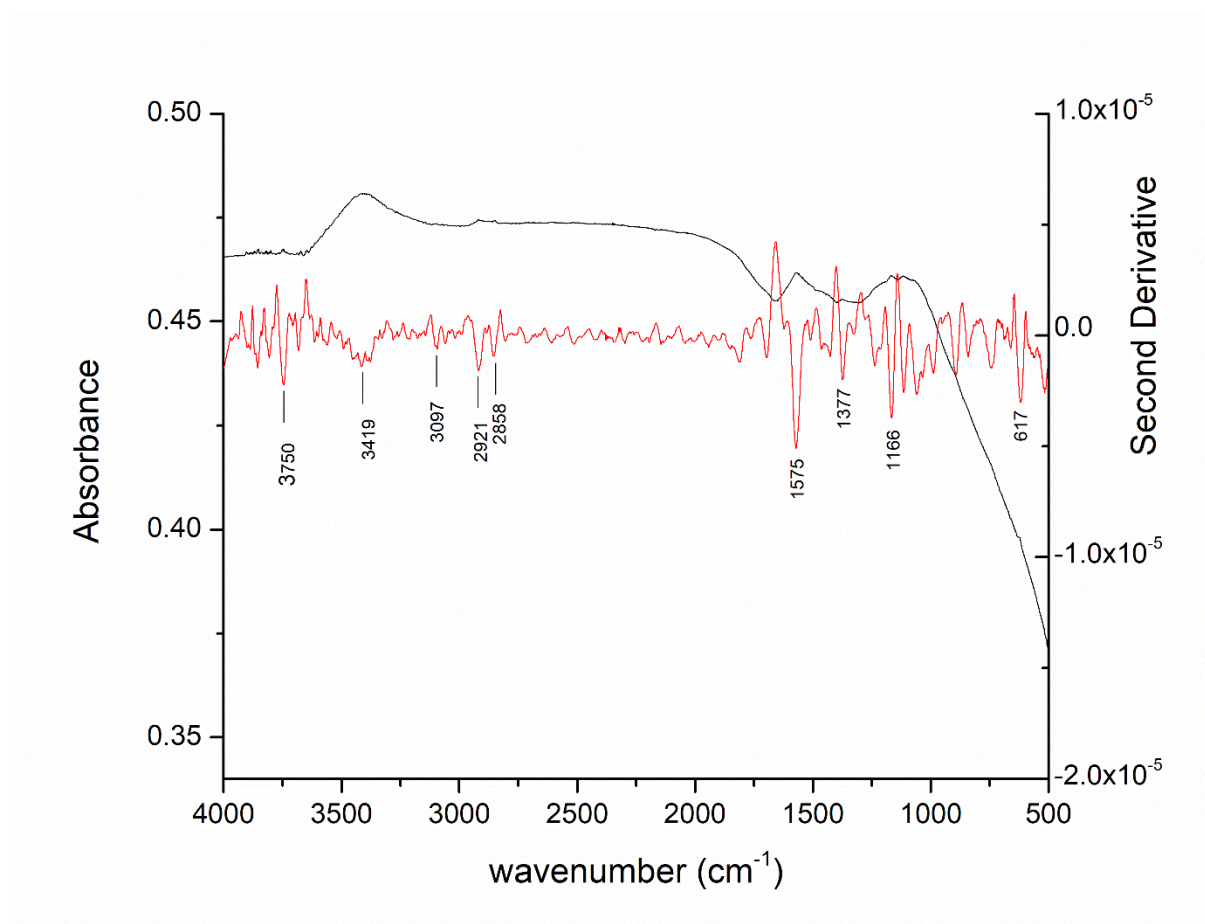

Figure S2. FT-IR spectrum of sample wAC (black line) and its second derivative (red line). The left and right hand side scales are referred to the absorbance of the spectrum and to its second derivative, respectively.

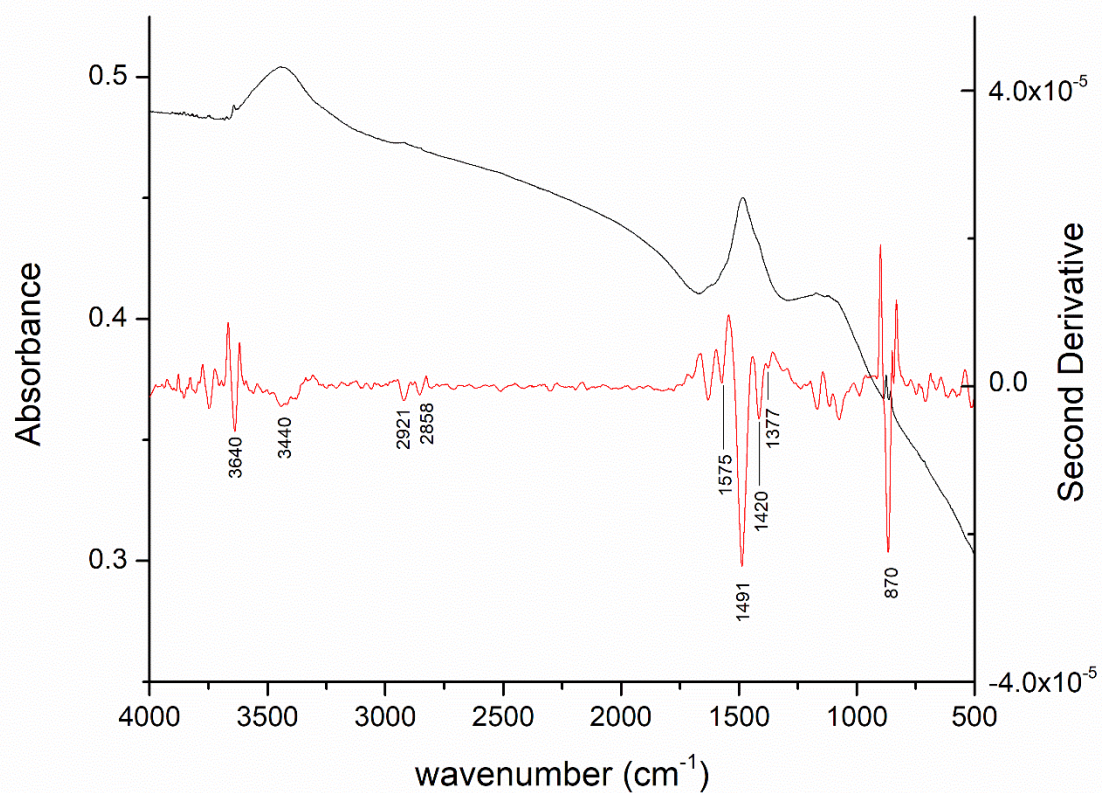

Figure S3. FT-IR spectrum of sample pB (black line) and its second derivative (red line). The left and right hand side scales are referred to the absorbance of the spectrum and to its second derivative, respectively.

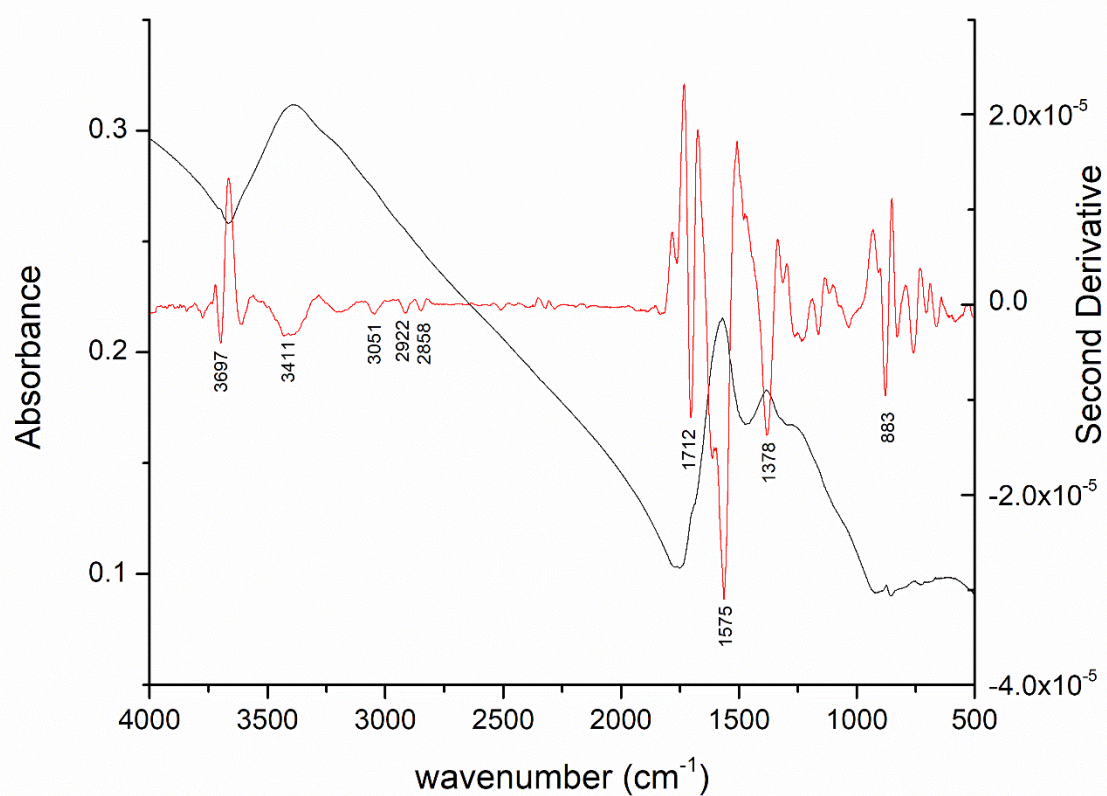

Figure S4. FT-IR spectrum of sample pAC\_meso (black line) and its second derivative (red line). The left and right hand side scales are referred to the absorbance of the spectrum and to its second derivative, respectively.

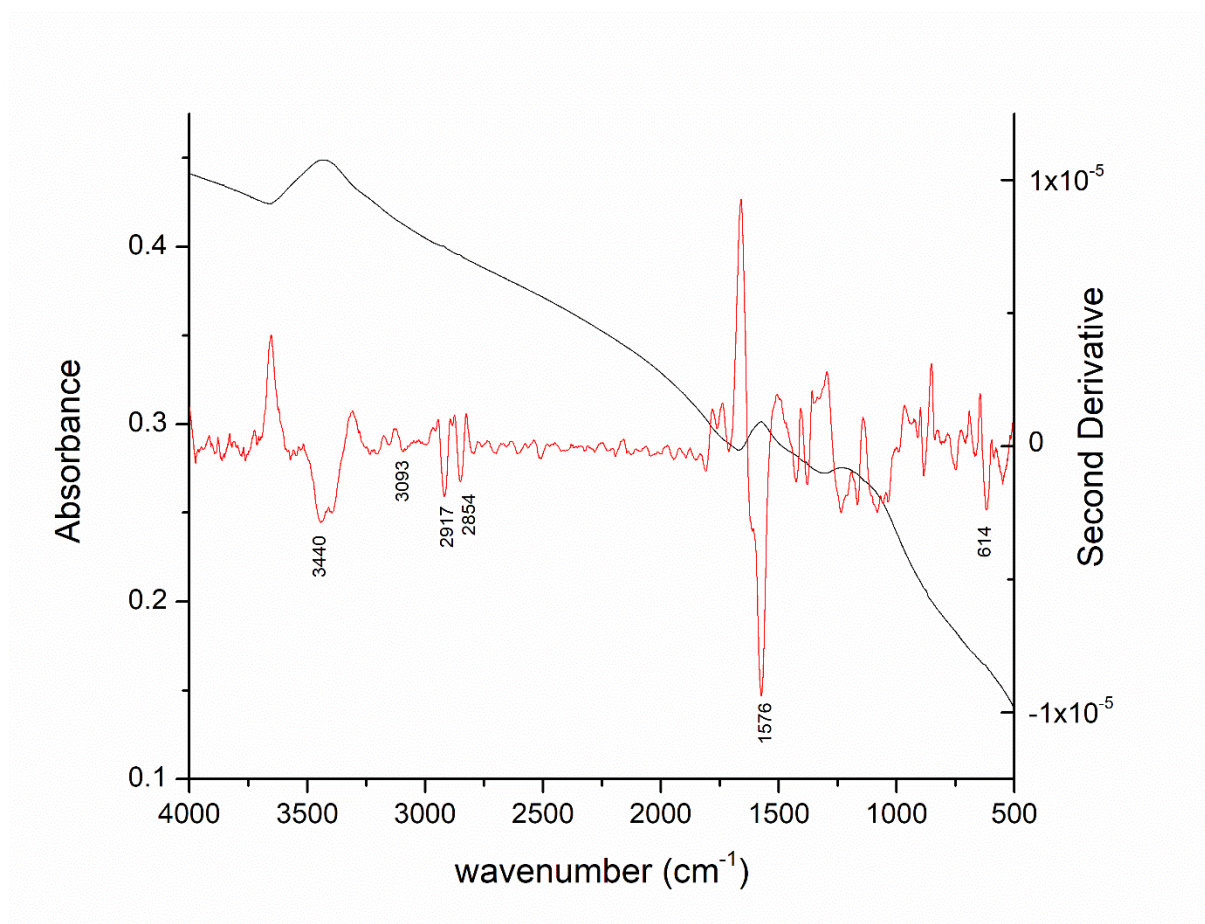

Figure S5. FT-IR spectrum of sample pAC\_micro (black line) and its second derivative (red line). The left and right hand side scales are referred to the absorbance of the spectrum and to its second derivative, respectively.
